# Supplementary material for: Prox1-positive cells monitor and sustain the murine intestinal epithelial cholinergic niche
Source: PubMed Central journal article supplement (PMC6949263; doi:10.1038/s41467-019-13850-7), 2020-01-08
Supplement: 41467_2019_13850_MOESM1_ESM.pdf [file 41467_2019_13850_MOESM1_ESM.pdf]

## **Supplementary Information**

**Prox1-positive cells monitor and sustain the murine intestinal epithelial  
cholinergic niche**

Middelhoff et al.

**Supplementary Materials:**

**Supplementary Figures 1-5 and figure legends**

**Supplementary Tables 1-3**

**Supplementary Data 1 (separate)**

**Source Data file (separate)**

**Supplementary References**

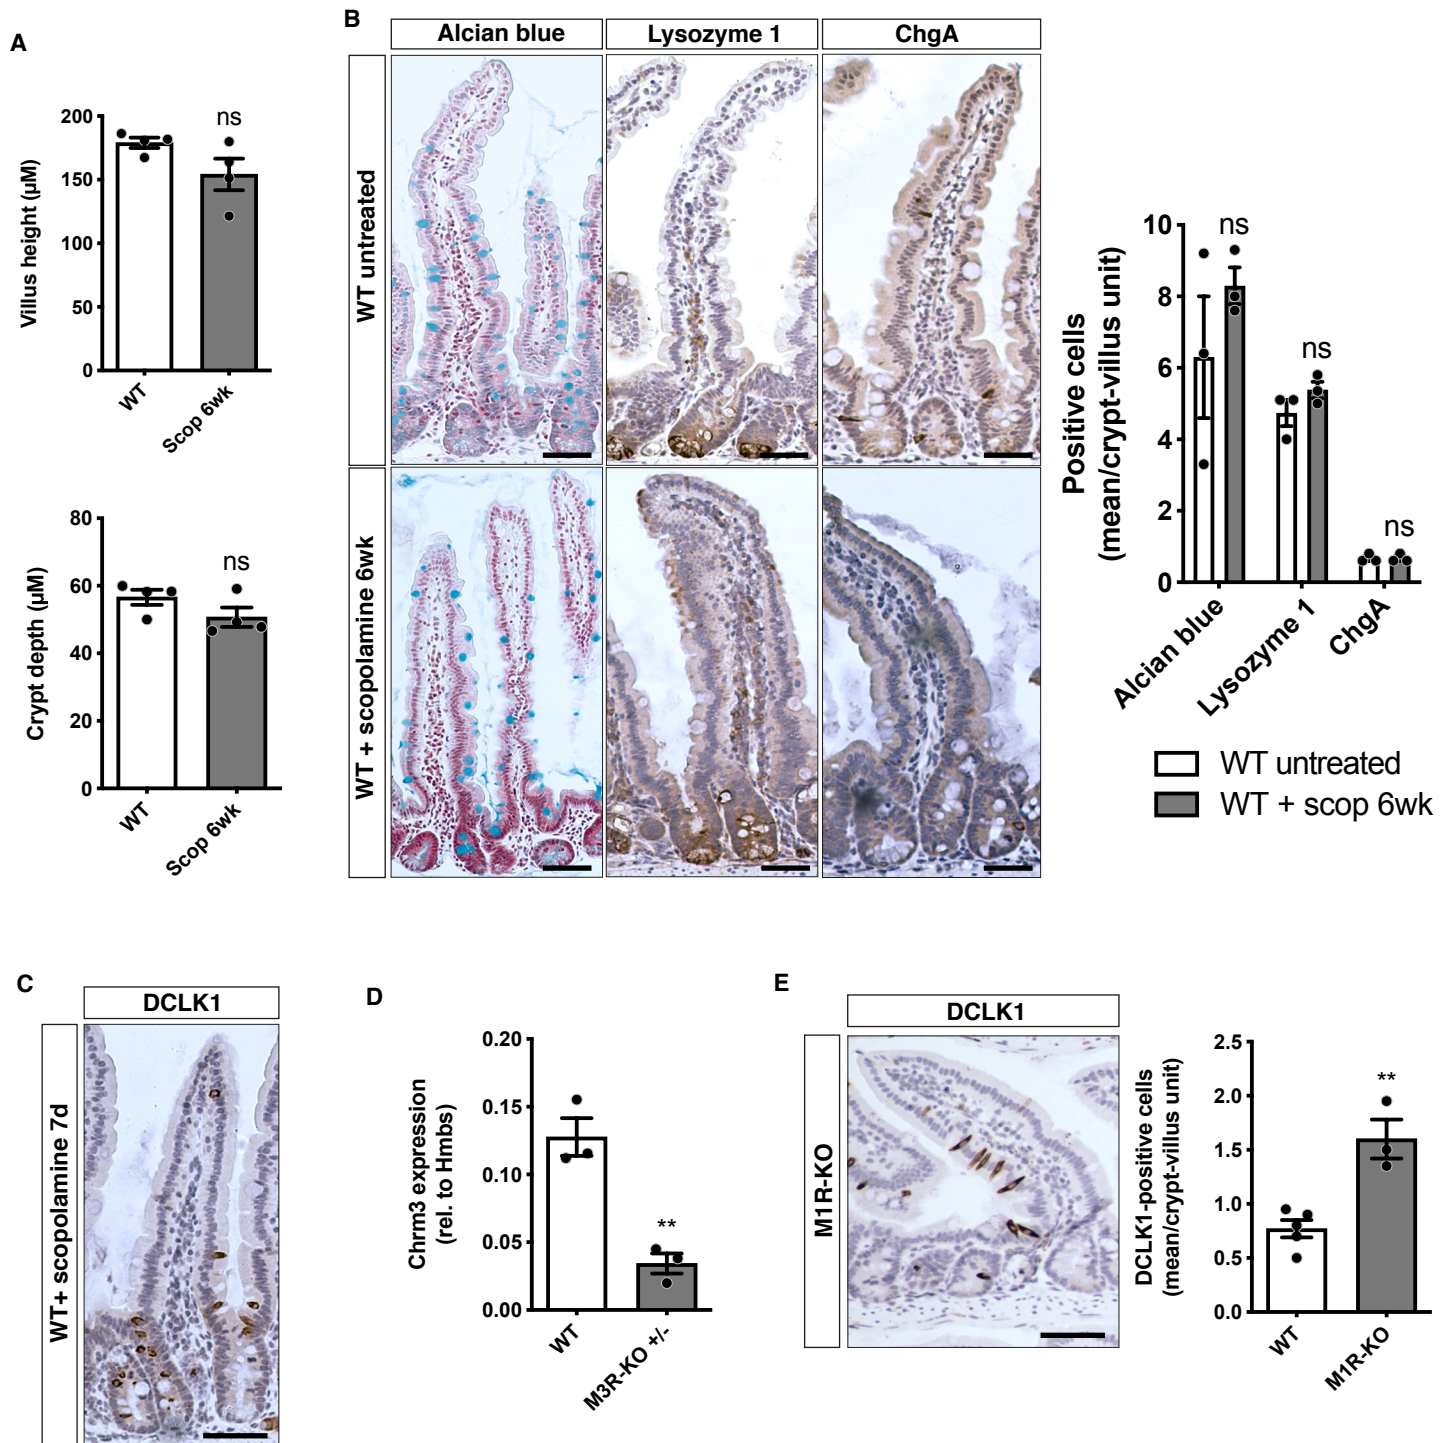

**Supplementary Figure 1 related to Fig. 1. Muscarinic receptor blockade results in**

**selective DCLK1-positive tuft cell expansion.** (A) Long-term (6wk) scopolamine

treatment of WT mice did not change intestinal tissue morphology in regards to villus

height (n=4 mice each group; WT Mean = 178.997, SEM = 4.061; WT + scopolamine

6wks Mean = 154.15, SEM = 12.387; unpaired t test, two-tailed,  $t=1.906$ ,  $df=6$ ) or crypt

depth (n=4 mice each group; WT Mean = 56.631, SEM = 2.232; WT + scopolamine

6wks Mean = 50.69, SEM = 2.849; unpaired t test, two-tailed,  $t=1.642$ ,  $df=6$ ). (B) Also,

we could not observe significant changes to goblet cells (Alcian blue), Paneth cells

(Lysozyme 1) or enterochromaffin cells (ChgA) following scopolamine treatment (n=3

WT mice for Alcian blue, Lysozyme 1, n=6 WT mice for ChgA; n=3 WT + scop 6wk mice

for Alcian blue, n=4 WT + scop 6wk mice for Lysozyme 1, ChgA; WT Alcian blue Mean =

6.3, SEM = 1.704; Lysozyme 1 Mean = 4.733, SEM = 0.367; ChgA Mean = 0.608, SEM

= 0.047; WT + scop 6wks Alcian blue Mean = 8.3, SEM = 0.513; Lysozyme 1 Mean =

5.175, SEM = 0.265; ChgA Mean = 0.663, SEM = 0.047; ordinary two-way ANOVA,

Alcian blue  $t=2.217$ ,  $df=17$ ; Lysozyme 1  $t=0.5235$ ,  $df=17$ ; ChgA  $t=0.07597$ ,  $df=17$ ), bar

graphs = 100  $\mu\text{m}$ . (C) DCLK1-positive tuft cell expansion also occurred following short-

term scopolamine treatment (7d), bar graph = 50  $\mu\text{m}$ . (D) RT-PCR analysis of jejunal

tissues from heterozygous M3R-KO mice confirmed significant reduction of *Chrm3*

expression (n=3 mice of each group; WT Mean = 0.128, SEM = 0.014; M3R-KO het

Mean = 0.034, SEM = 0.007; unpaired t test, two-tailed,  $t=5.933$ ,  $df=4$ ). (E) Jejunal

tissues of homozygous M1R-KO mice showed modest DCLK1-positive tuft cell

expansion (n=5 WT mice, n=3 M1R-KO mice; WT Mean = 0.77, SEM = 0.080; M1R-KO

Mean = 1.6, SEM = 0.18; unpaired t test, two-tailed,  $t=4.898$ ,  $df=6$ ), bar graph = 50  $\mu\text{m}$ .

Source data are provided as a Source Data file. \*\* =  $p < 0,01$ , ns = not significant.

Supplementary Figure 2

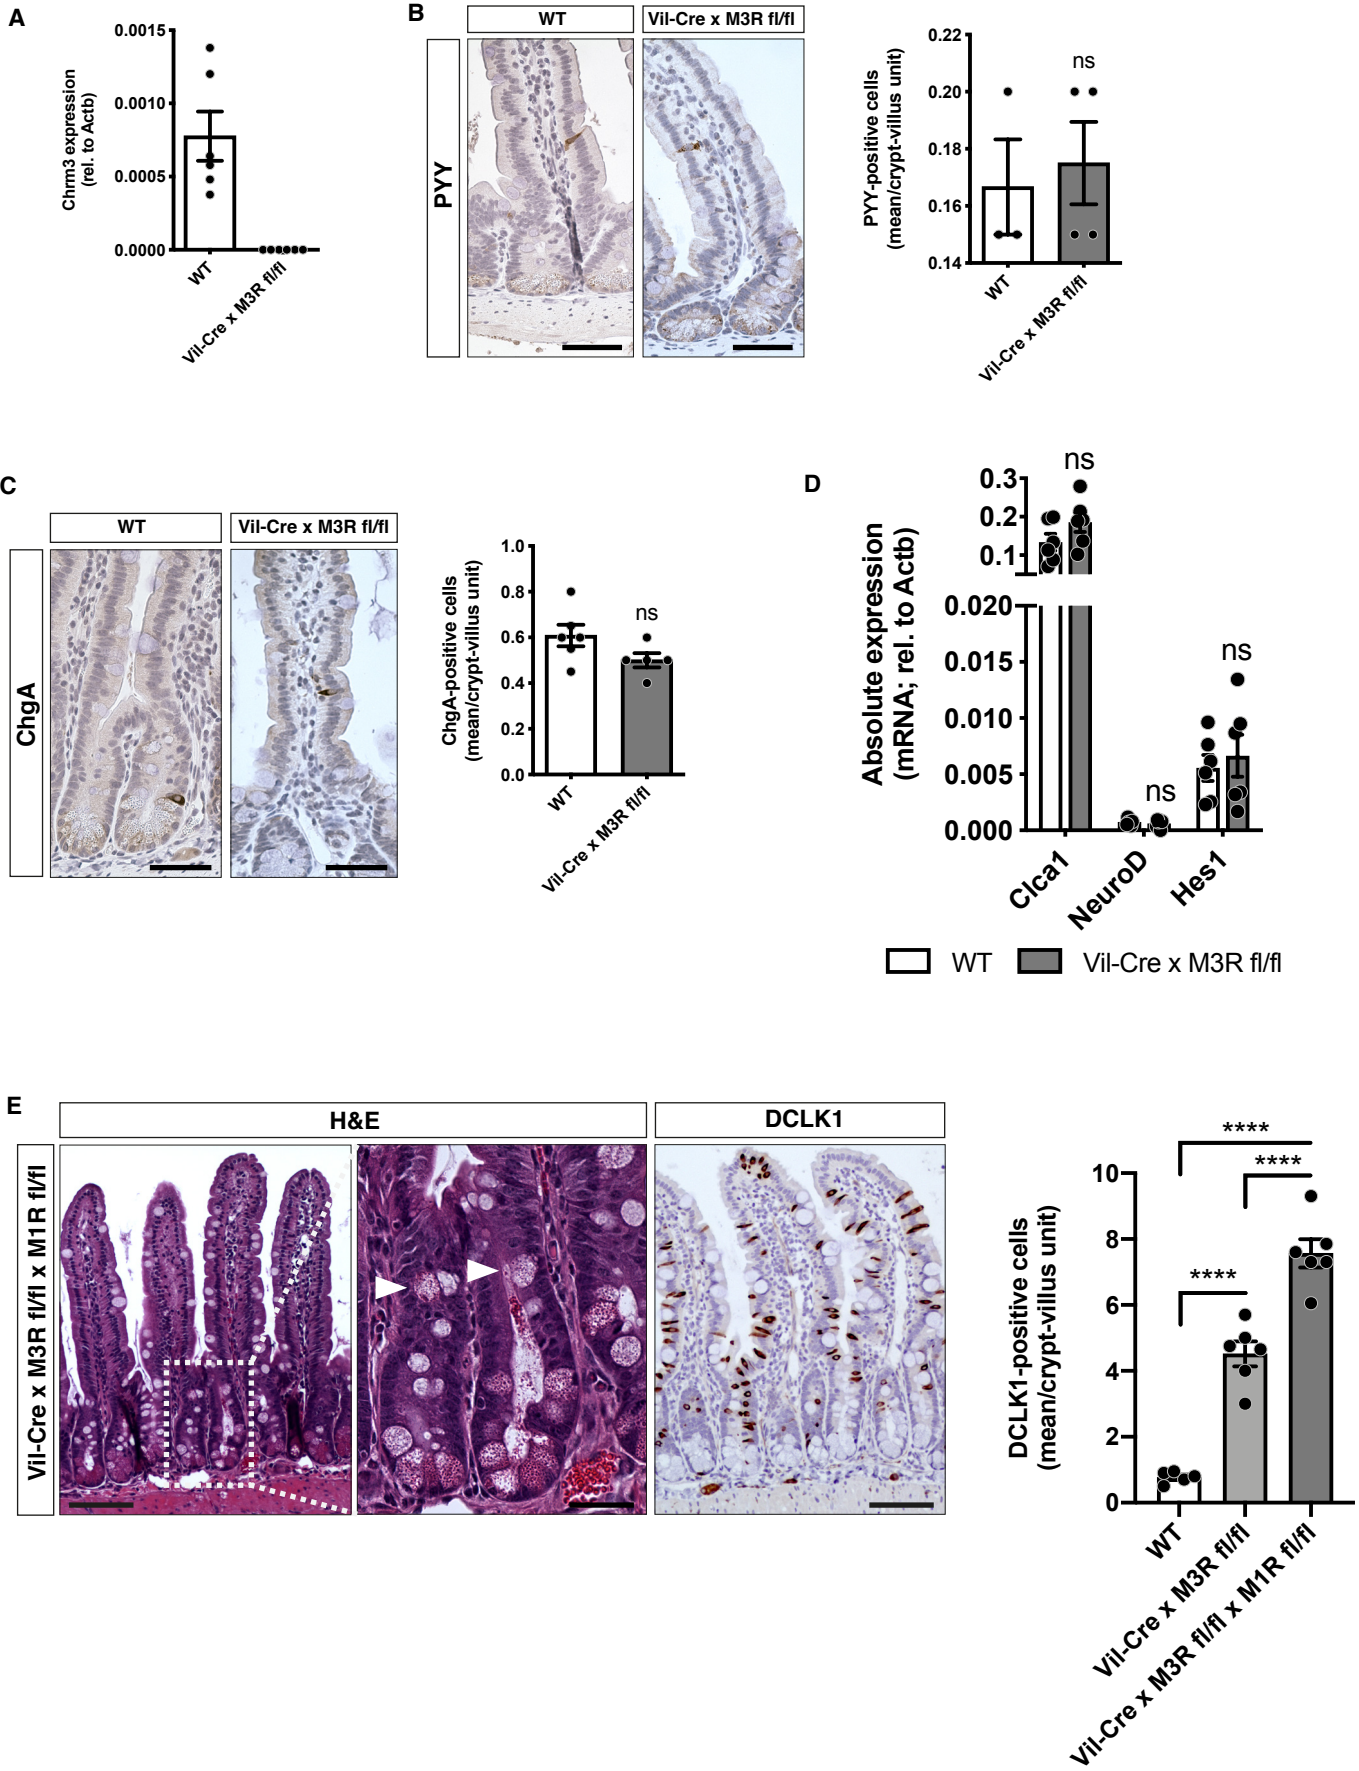

**Supplementary Figure 2 related to Fig. 1. The epithelial compartment senses cholinergic interruption and initiates selective DCLK1-positive tuft cell expansion.**

(A) RT-PCR analyses of epithelial-enriched samples from Vil-Cre x M3R fl/fl mice for *Chrm3* transcript (n=6 WT and Vil-Cre x M3R fl/fl mice); n.d. = not detectable. (B, C) Immunohistochemical stainings for enteroendocrine (PYY; n=3 WT, n=4 Vil-Cre x M3R fl/fl mice; WT Mean = 0.167, SEM = 0.017; Vil-Cre x M3R fl/fl Mean = 0.175, SEM = 0.014; unpaired t test, two-tailed,  $t=0.3780$ ,  $df=5$ ) as well as enterochromaffin (ChgA; n=6 WT, n=5 Vil-Cre x M3R fl/fl mice; WT Mean = 0.608, SEM = 0.047; Vil-Cre x M3R fl/fl Mean = 0.5, SEM = 0.032; unpaired t test, two-tailed,  $t=1.189$ ,  $df=9$ ) cell subtypes following epithelial M3R ablation; bar graphs = 50  $\mu\text{m}$ . (D) RT-PCR analyses of epithelial-enriched samples from Vil-Cre x M3R fl/fl mice for transcripts associated with secretory (*Clca1*), absorptive (*Hes1*) or endocrine cell (*NeuroD1*) development (n=6 WT and Vil-Cre x M3R fl/fl mice; WT *Clca1* Mean = 0.133, SEM = 0.022; *NeuroD* Mean = 0.001, SEM = 0.0001; *Hes1* Mean = 0.006, SEM = 0.001; Vil-Cre x M3R fl/fl *Clca1* Mean = 0.186, SEM = 0.025; *NeuroD* Mean = 0.001, SEM = 0.0001; *Hes1* Mean = 0.007, SEM = 0.002; multiple t tests, *Clca1*  $t=1.565$ ,  $df=10$ ; *NeuroD*  $t=0.7157$ ,  $df=10$ ; *Hes1*  $t=0.4921$ ,  $df=10$ ). (E) Vil-Cre x M3R fl/fl x M1R fl/fl mice showed a dramatic expansion of DCLK1-positive tuft cells compared to WT mice (n=5 WT mice, n=6 Vil-Cre x M3R fl/fl and Vil-Cre x M3R fl/fl x M1R fl/fl mice; WT Mean = 0.77, SEM = 0.080; Vil-Cre x M3R fl/fl Mean = 4.517, SEM = 0.377; Vil-Cre x M3R fl/fl x M1R fl/fl Mean = 7.567, SEM = 0.429; ordinary one-way ANOVA,  $F=88.82$ ,  $df$  (total)=16); inset shows magnification of misplaced Paneth-like cells along the crypts reminiscent of intermediate cells (white arrowheads); bar graph left, right = 100  $\mu\text{m}$ , bar graph center (magnification) = 25  $\mu\text{m}$ . Source data are provided as a Source Data file. \*\*\*\* =  $p < 0,001$ , ns = not significant.



# Supplementary Figure 3

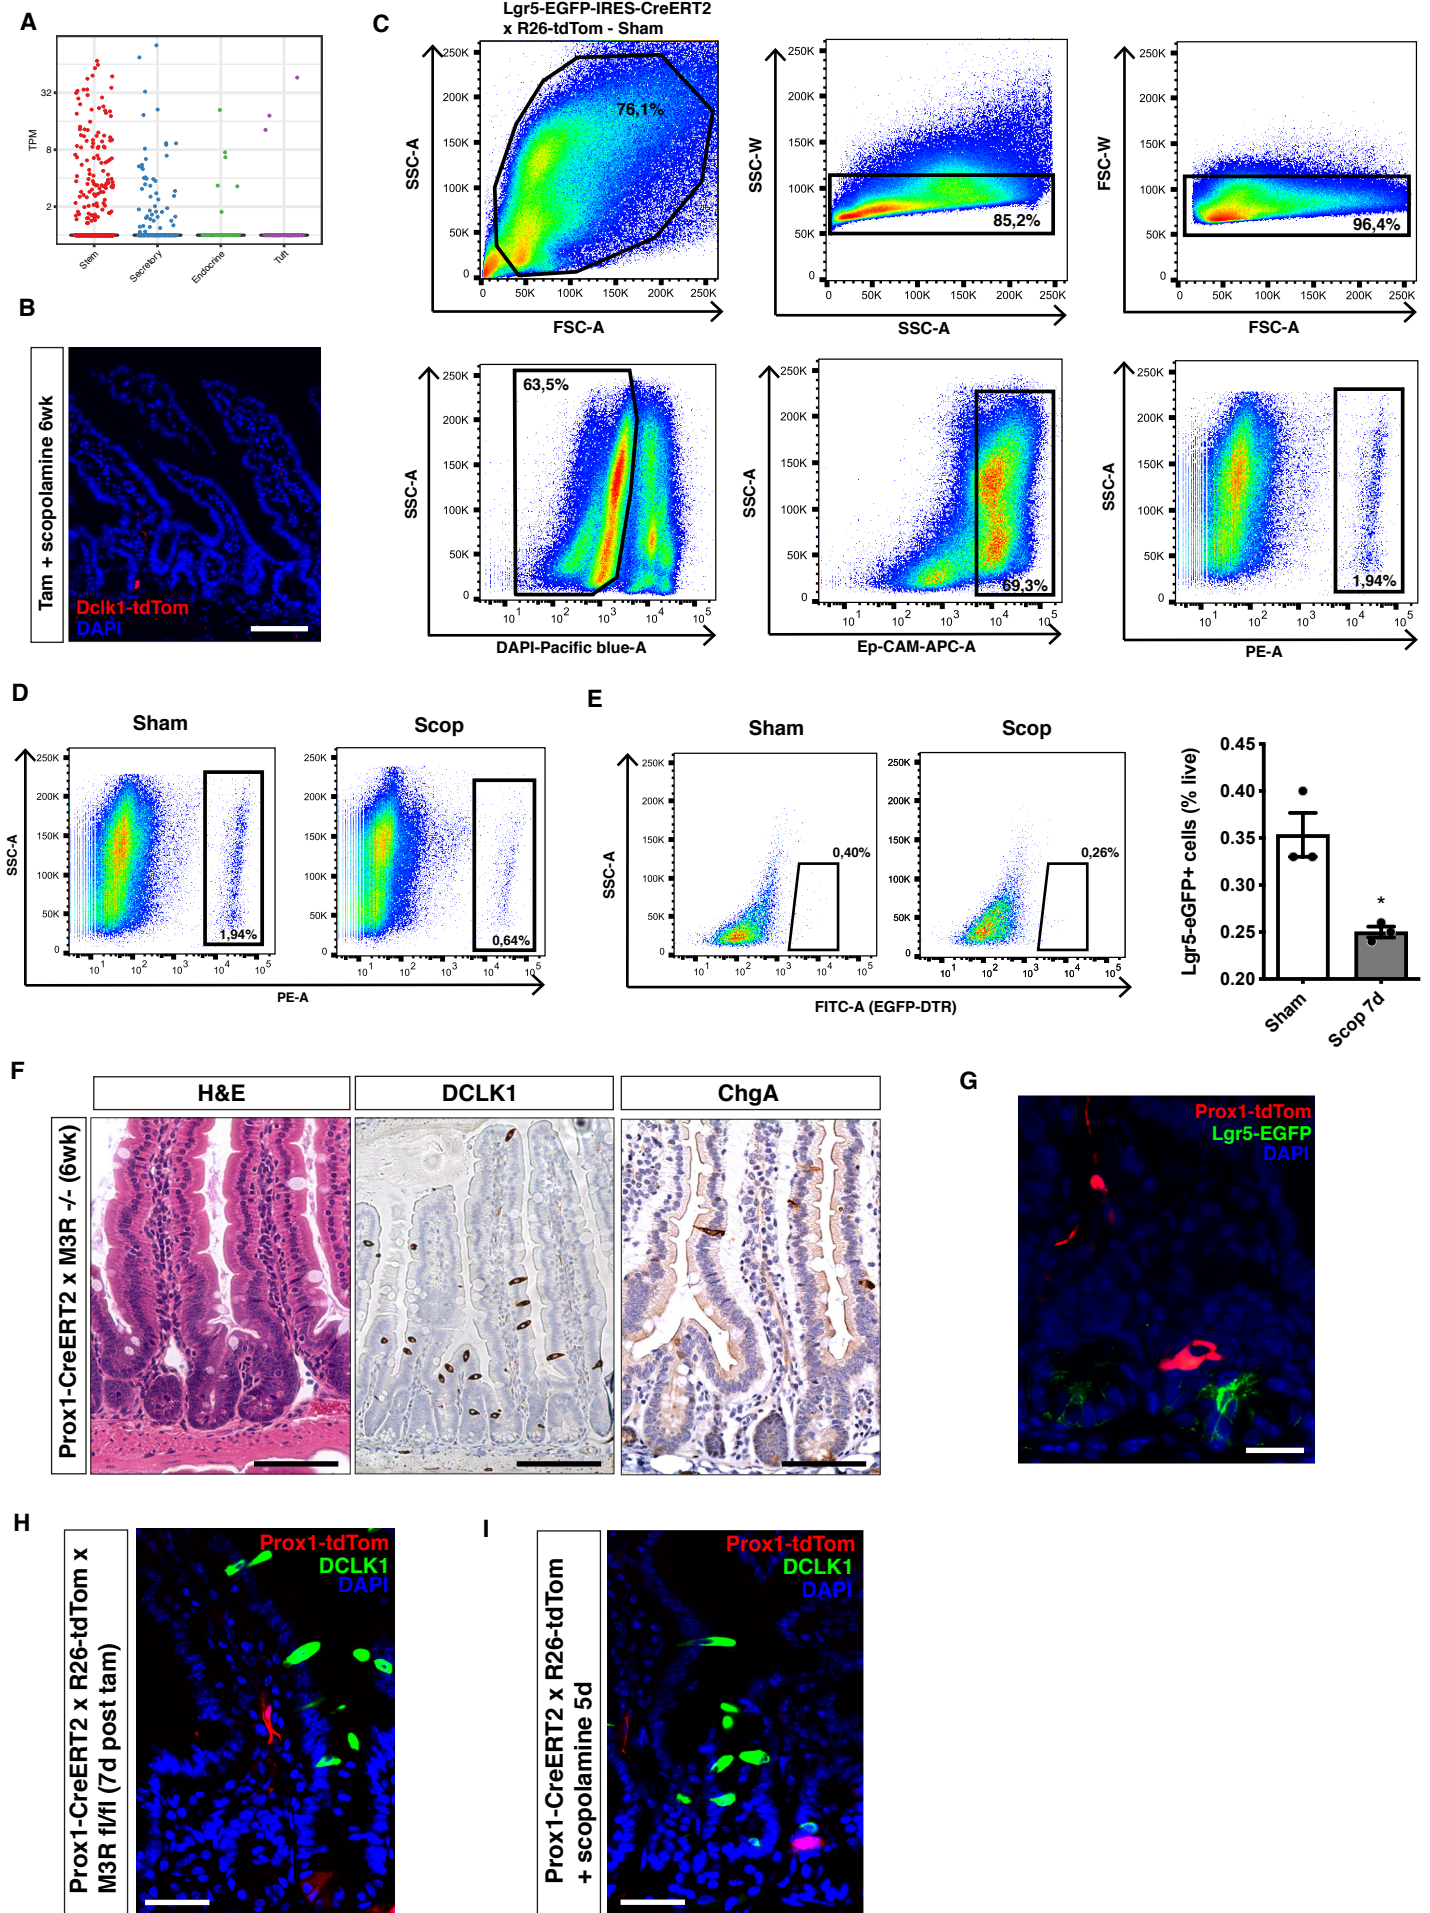

**Supplementary Figure 3 related to Fig. 2. Changes in intestinal cholinergic muscarinic transmission differentially affect Lgr5-positive ISC and Prox1-positive endocrine cells.** (A) Single-cell *Chrm3* expression among secretory cells, stem cells (defined by *Lgr5*, *Ascl2*, *Axin2* or *Olfm4* expression) and endocrine cell types (expressing *ChgA*, *Tac1*, *Neurog3* or *Prox1*)<sup>1</sup> (TPM = transcript per kilobase million). (B) Long-term (6wk) scopolamine treatment following the induction of *Dclk1*-BAC-CreERT x R26-tdTom mice (n=6 mice, representative picture, repeated at least 5 times); bar graph = 100  $\mu$ m. (C, D) Exemplification of flow cytometry gating strategy for sham- and scopolamine-treated induced *Lgr5*-EGFP-IRES-CreERT2 x R26-tdTom mice (d1 begin scopolamine / sham treatment, d3 Tam induction, d7 sacrifice). (E) Short-term scopolamine treatment (7d) of *Lgr5*-EGFP-DTR mice revealed significant decrease of *Lgr5*-EGFP-positive ISC count (n=3 per group; *Lgr5*-EGFP-DTR Sham Mean = 0.3533, SEM = 0.02333; *Lgr5*-EGFP-DTR + Scop 7d Mean = 0.25, SEM = 0.005774; unpaired t test, two-tailed, t=4.299, df=4). (F) Analysis of DCLK1-positive tuft cells and ChgA-positive enterochromaffin cells six weeks following single tamoxifen induction of *Prox1*-CreERT2 x M3R fl/fl mice (n= 3 mice); bar graphs = 100  $\mu$ m. (G) Analysis of induced *Prox1*-CreERT2 x R26-tdTom x *Lgr5*-EGFP-DTR mice revealed the absence of positive cell overlap (representative picture, repeated at least 3 times); bar graph = 50  $\mu$ m. (H) Conditional M3R ablation in the *Prox1*-positive cell lineage (*Prox1*-CreERT2 x R26-tdTom x M3R fl/fl mice, 7d post Tam) did result in DCLK1-positive tuft cell expansion, with absent expansion of *Prox1*-positive cells or *Prox1* tracing of DCLK1-positive tuft cells (n=3 mice, representative picture, repeated at least 5 times); bar graph = 50  $\mu$ m. (I) Short-term scopolamine treatment (5d) of induced *Prox1*-CreERT2 x R26-tdTom mice recapitulated a similar phenotype (n=3 mice, representative picture, repeated at least 5

times); bar graph = 50  $\mu$ m. Source data are provided as a Source Data file. \* =  $p < 0,05$ ,  
SSC = side scatter, FSC = forward scatter, APC = allophycocyanin, PE = phycoerythrin,  
FITC = fluorescein isothiocyanate.



# Supplementary Figure 4

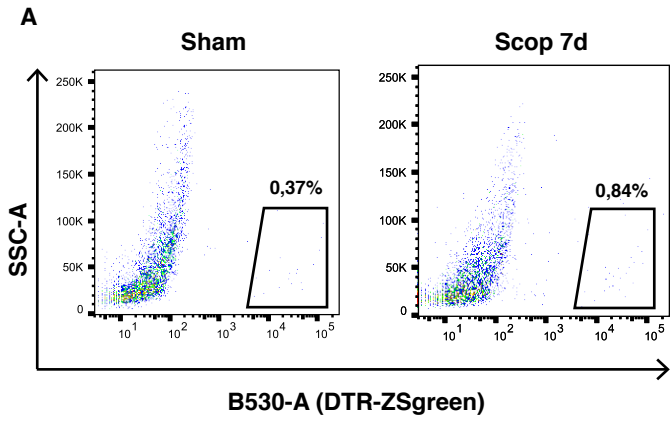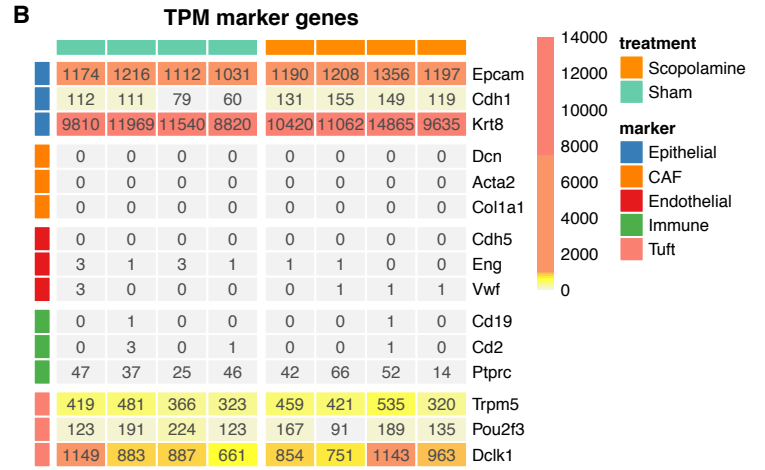

**C** Scopolamine vs. Sham treated TC  
Number of DEG

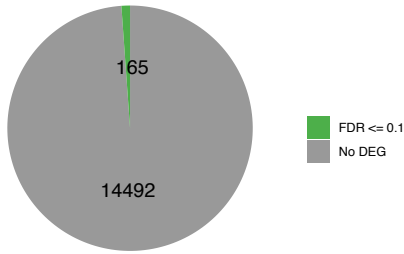

**D**

**Muscarinic receptors (TPM)**

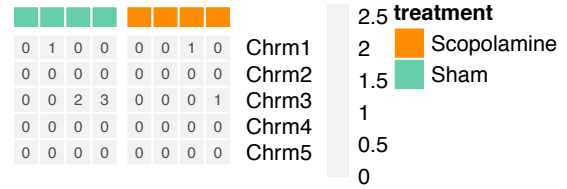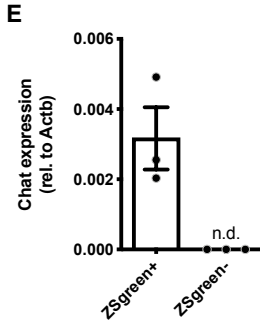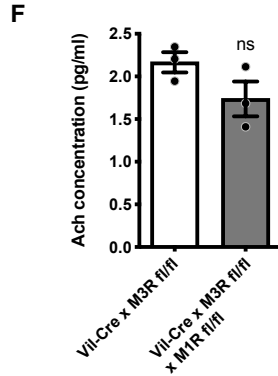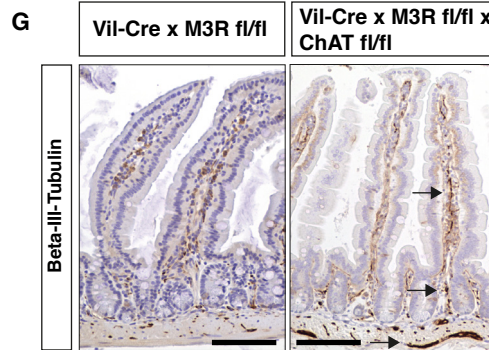

**H**

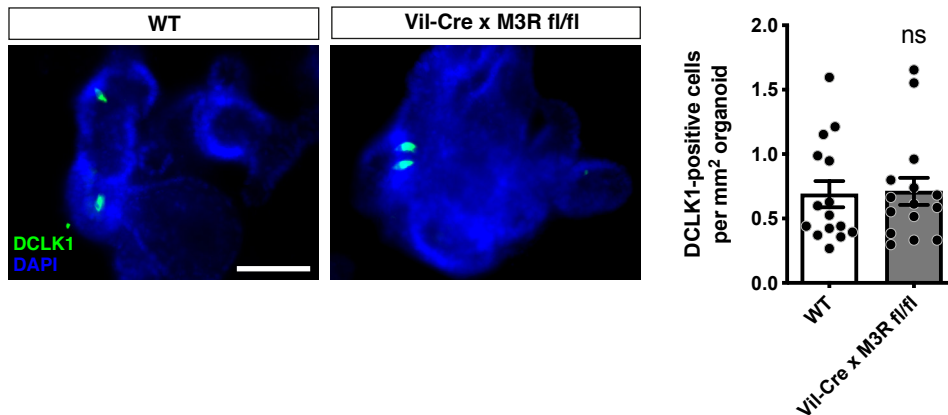

### **Supplementary Figure 4 related to Figs. 3 and 4. Enteroendocrine tuft cell**

**expansion contributes to cholinergic niche in vivo.** (A) Similar gating strategy to Supplementary Fig. 3C showing live/Ep-CAM-positive DTR-ZSgreen-positive tuft cells sorted for bulk RNA sequencing analysis (n=4 mice sham; scopolamine-treated). (B) Examination of gene expression in transcript per kilobase million (TPM) of cell-specific marker genes (epithelial, fibroblasts/CAF, endothelial, immune and tuft cell, respectively) suggests high purity of sorted ZSgreen-positive tuft cells. (C) Pie chart illustrating the number of differentially expressed genes at a false discovery rate of 0.1 in comparison to genes that do not change expression levels significantly. (D) Examination of TPM for muscarinic receptors reveals the preponderant absence of expression among ZSgreen-positive tuft cells. (E) RT-PCR analysis of sorted epithelial (Ep-CAM+) Dclk1-DTR-ZSgreen-positive versus -negative cells confirmed unique expression of *Chat* in tuft cells (n=3 mice); n.d. = not detectable. (F) Simultaneous epithelial ablation of M3R and M1R did not increase mucosal Ach levels compared to Vil-Cre x M3R fl/fl mice alone (n=5 Vil-Cre x M3R fl/fl mice, n=4 Vil-Cre x M3R fl/fl x M1R fl/fl mice; Vil-Cre x M3R fl/fl Mean = 1.958, SEM = 0.143; Vil-Cre x M3R fl/fl x M1R fl/fl Mean = 1.762, SEM = 0.147; unpaired t test, two-tailed, t=0.9458, df=7). (G) Tissue analysis of Vil-Cre x M3R x ChAT fl/fl mice for Beta-III-Tubulin reveals more prominent labeling of stromal nerve fibers compared to Vil-Cre x M3R fl/fl mice (representative pictures, repeated at least 5 times), bar graphs = 100  $\mu$ m. (H) Analysis of organoid cultures of WT and Vil-Cre x M3R fl/fl mice at day 5 of culture reveals no significant changes to DCLK1-positive tuft cell numbers (n=1 WT and Vil-Cre x M3R fl/fl mouse, values represent 3-4 analyzed organoids per technical replicate, 3-4 technical replicates per sample; WT Mean = 0.69, SEM = 0.102; Vil-Cre x M3R fl/fl Mean = 0.711, SEM = 0.105; unpaired t test, two-tailed, t=0.1464, df=28); bar

graph = 50  $\mu$ m. ns = not significant, SSC = side scatter. Source data are provided as a Source Data file.

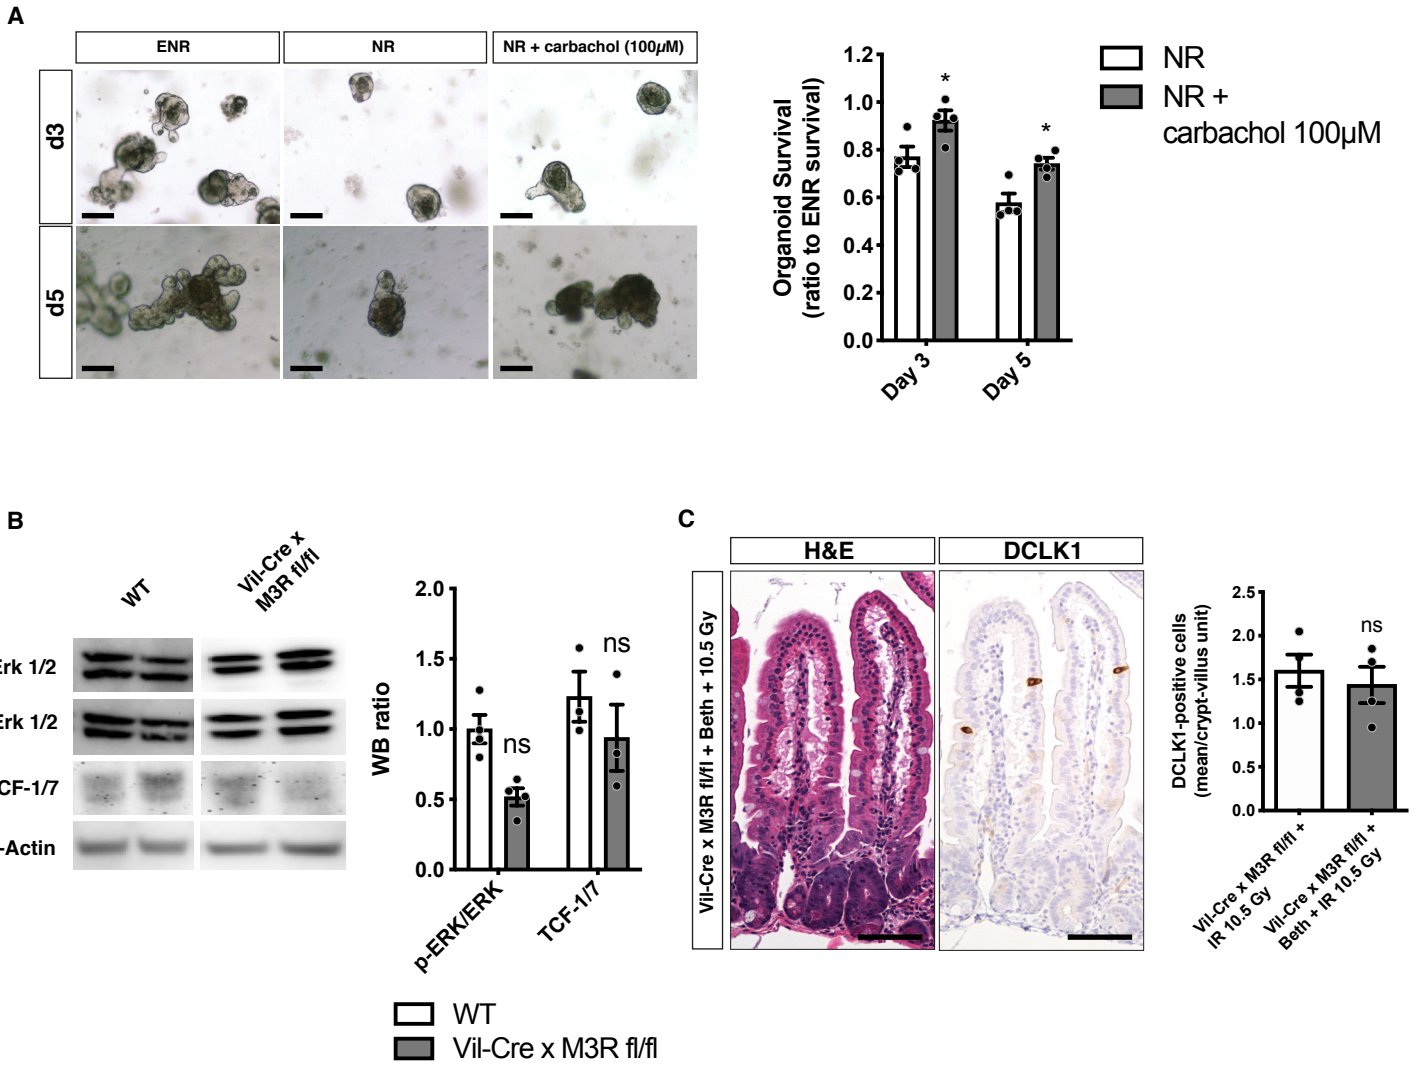

**Supplementary Figure 5 related to Figs. 5 and 6. The compensatory increase of cholinergic niche signaling sustains intracellular signaling and homeostasis. (A)**

Small intestinal organoids treated with the non-selective muscarinic receptor agonist carbachol revealed partial rescue of organoid growth and survival following EGF ligand withdrawal (n=4 mice per group and timepoint; 3 technical replicates per mouse; NR d3 Mean = 0.77, SEM = 0.043, d5 Mean = 0.577, SEM = 0.039; NR + carbachol 100 $\mu$ M d3 Mean = 0.923, SEM = 0.042, d5 Mean = 0.742, SEM = 0.025; ordinary two-way ANOVA, day 3 t=2.834, df=12, day 5 t=3.057, df=12); ENR = EGF, noggin, R-spondin1; d = day; bar graphs = 50  $\mu$ m. (B) Intracellular ERK activation and TCF did not significantly change in Vil-Cre x M3R fl/fl compared to WT mice (n=4 WT and Vil-Cre x M3R fl/fl mice for p-ERK/ERK; n=3 mice per group for TCF-1/7; WT p-ERK/ERK Mean = 1, SEM = 0.101, TCF-1/7 Mean = 1.231, SEM = 0.178; Vil-Cre x M3R fl/fl p-ERK/ERK Mean = 0.517, SEM = 0.062, TCF-1/7 Mean = 0.938, SEM = 0.236; ordinary two-way ANOVA, p-ERK/ERK t=2.595, df=10, p=0.0527; TCF-1/7 t=1.360, df=10). (C) Short-term Bethanechol treatment (start d1, d3 WBI 10.5Gy IR, d7 analysis) did only moderately decrease DCLK1-positive tuft cell number, while dramatically improving tissue morphology following injury (n=4 per group; Vil-Cre x M3R fl/fl + IR 10.5 Gy Mean = 1.6, SEM = 0.185; Vil-Cre x M3R fl/fl + Beth + IR 10.5 Gy Mean = 1.438, SEM = 0.207; unpaired t test, two-tailed, t=0.5863, df=6). ns = not significant. Source data are provided as a Source Data file.

**Supplementary Table 1. List of cDNA primers used for RT-PCR.**

| Gene ID | NCBI Accession nr | Protein ID                           | FWD 5'-3'                 | REV 5'-3'              |
|---------|-------------------|--------------------------------------|---------------------------|------------------------|
| Hmbs    | NM_001110251.1    | Porphobilinogen Deaminase            | TTGGAAAGACCCTGGAAACC      | TGAATTCCTGCAGCTCATCC   |
| Actb    | NM_007393.5       | Beta-Actin                           | TAGACTTCGAGCAGGAGATGG     | CAGGATTCCATACCCAAGAAGG |
| Chrm1   | NM_001112697.1    | Muscarinic acetylcholine receptor M1 | CAGAAGTGGTGATCAAGATGCCTAT | GAGCTTTTGGGAGGCTGCTT   |
| Chrm2   | NM_203491.3       | Muscarinic acetylcholine receptor M2 | TGGAGCACAACAAGATCCAGAAT   | CCCCTGAACGCAGTTTTCA    |
| Chrm3   | NM_033269.4       | Muscarinic acetylcholine receptor M3 | CTGCGTTCTGACCAAGTGAC      | TGTGCAAGGTCATTGTGACTC  |
| Chrm4   | NM_007699.2       | Muscarinic acetylcholine receptor M4 | GTGACTGCCATCGAGATCGTAC    | CAAACCTTCGGGCCACATG    |
| Chrm5   | NM_205783.2       | Muscarinic acetylcholine receptor M5 | TTCCGATTGGTGGTAAAGC       | TTTGGACACTGGGAAGGAC    |
| Chat    | NM_009891.2       | Choline acetyltransferase            | ACATACCTGATGAGCAACCG      | AAAGCTGGAGATGCAGAAGG   |
| Clca1   | NM_017474.2       | Chloride channel accessory 1         | GATCGCTCAGCACTCCAT        | GAGCCATTCATCCATTGGTTA  |
| Neurod1 | NM_010894.2       | Neurogenic differentiation factor 1  | ACCAAATCATACAGCGAGAGC     | GTCCTCCTCTGCATTCATGG   |
| Hes1    | NM_008235.2       | Hairy and enhancer of split 1        | CATTCTGGAAATGACTGTGAAGC   | TGTTAACGCCCTCACACGG    |



**Supplementary Table 2. Employed antibodies for immunohistochemistry and immunofluorescence or flow cytometry.**

| Protein                       | Company       | Cat-nr. | Dilution (IHC <sup>a</sup> , IF <sup>b</sup> ; FC <sup>c</sup> ) | Source |
|-------------------------------|---------------|---------|------------------------------------------------------------------|--------|
| DCAMKL1 (DCLK1)               | Abcam         | 31704   | 1:500 (IHC, IF)                                                  | Rabbit |
| Lysozyme 1                    | Dako          | 74097   | 1:1000 (IHC)                                                     | Rabbit |
| ChgA                          | Abcam         | 15160   | 1:400 (IHC, IF)                                                  | Rabbit |
| M3R                           | Abcam         | 126168  | 1:250 (IF)                                                       | Rabbit |
| PYY                           | Abcam         | 22663   | 1:300 (IHC)                                                      | Rabbit |
| Beta-III-Tubulin              | Abcam         | 18207   | 1:1000 (IHC)                                                     | Rabbit |
| APC anti-mouse CD326 (Ep-CAM) | Biolegend     | 118214  | 1:200 (FC)                                                       |        |
| DAPI                          | BD Pharmingen | 564907  | 1:10000 (FC)                                                     |        |

<sup>a</sup> Immunohistochemistry

<sup>b</sup> Immunofluorescence

<sup>c</sup> Flow cytometry

**Supplementary Table 3. Employed antibodies for Western blot (immunoblot).**

| Target             | MW <sup>a</sup> | Company            | Lot#   | Dilution/Stock                      | Source |
|--------------------|-----------------|--------------------|--------|-------------------------------------|--------|
| EGFR               | 180 kDA         | Millipore<br>Sigma | 06-847 | 1:500 – 1 mg/ml<br>(=2 µg/ml)       | Rabbit |
| p-EGFR             | 185 kDA         | Millipore<br>Sigma | 07-820 | 1:1000                              | Rabbit |
| ERK 1/2            | 44/42<br>kDA    | Cell<br>Signaling  | 4695   | 1:1000                              | Rabbit |
| p-ERK              | 44/42<br>kDA    | Cell<br>Signaling  | 9102   | 1:1000                              | Rabbit |
| panAkt             | 60 kDA          | Cell<br>Signaling  | 4691   | 1:500                               | Rabbit |
| p-Akt              | 60 kDA          | Cell<br>Signaling  | 13038  | 1:1000                              | Rabbit |
| pl3Kinase          | 110 kDA         | Cell<br>Signaling  | 4249   | 1:1000                              | Rabbit |
| PDK1               | 68 kDA          | Cell<br>Signaling  | 3062   | 1:1000                              | Rabbit |
| DCAMKL1<br>(DCLK1) | 82 kDA          | Abcam              | 31704  | 1:2000 – 1<br>mg/ml (=0.5<br>µg/ml) | Rabbit |
| M3R                | 66 kDA          | Abcam              | 126168 | 1:500                               | Rabbit |
| TCF-1/7            | 48/50<br>kDA    | Cell<br>Signaling  | 2203   | 1:1000                              | Rabbit |
| β-Actin            | 45 kDA          | Cell<br>Signaling  | 4970   | 1:5000                              | Rabbit |

<sup>a</sup> Molecular weight

## Supplementary References:

1. Haber, A.L. *et al.* A single-cell survey of the small intestinal epithelium. *Nature* **551**, 333-339 (2017).
